# Supplementary material for: Synergistic Transcriptional and Post-Transcriptional Regulation of ESC Characteristics by Core Pluripotency Transcription Factors in Protein-Protein Interaction Networks
Source: PubMed Central journal article supplement (PMC4149371; doi:10.1371/journal.pone.0105180), 2014-08-29

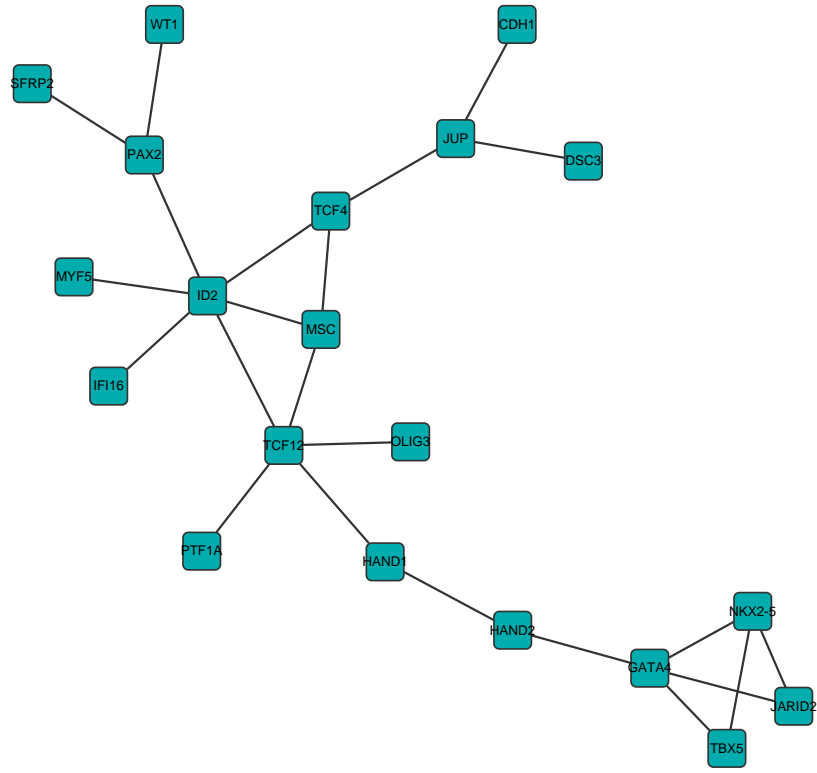

Supplement: pone.0105180.s001.pdf [file pone.0105180.s001.pdf]
